# Supplementary material for: Observationally constrained analysis of sulfur cycle in the marine atmosphere with NASA ATom measurements and AeroCom model simulations
Source: Copernicus journal article supplement (doi:10.5194/acp-24-1717-2024), 2024-02-07
Supplement: Supplementary file 1 [file acp-24-1717-2024-supplement.pdf]

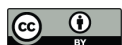

*Supplement of*

## **Observationally constrained analysis of sulfur cycle in the marine atmosphere with NASA ATom measurements and AeroCom model simulations**

**Huisheng Bian et al.**

*Correspondence to:* Huisheng Bian ([huisheng.bian@nasa.gov](mailto:huisheng.bian@nasa.gov))

The copyright of individual parts of the supplement might differ from the article licence.

## Supplementary Material

SO<sub>4</sub> PDF distributions observed from AMS data at three sampling intervals (i.e., 1-s, 60-s, and 10-s) are shown in Fig. S1. The 10-s merged dataset were deliberately provided by the ATom observation team for integrating data from various instruments to a unified temporal resolution. We use this dataset for investigation on regional and seasonal bases. Before applying it, however, we first evaluate the quality of the 10-s data. Previous studies (Hodzic et al., 2020) indicated measurement precision improved with the square root of the number of sampling points. In other words, averaging data over a 60-s interval is better than averaging over 1-s or 10-s intervals because there are more sample points in a 60-s interval. This also applies to the detection limit (DL) as it is just 3 times the precision. DL flags are assigned to convey semi-quantitative information when sampling conditions are beyond the instrument detection range and the measurements are not quantifiable. Despite the differences, the three PDFs of AMS SO<sub>4</sub> (red, using all relevant data including negatives) are nearly identical. Statistical analyses were further performed on the AMS 60-s, 10-s, and 1-s data sets by (1) all sampling points, even negative values, as indicated by the dot-dash box-and-whisker (approach 1), and (2) sampling points when their values exceeded DL as shown by solid box-and-whisker (approach 2). The SO<sub>4</sub> median (and mean) values of 60-s are closer to 10-s' but lesser than 1-s' by 0-10% in approach 1. There is slightly greater diversity (~30%, solid box-and-whisker) between these statistical values in approach 2, and the data in 60-s and 10-s are also relatively close, with a difference less than ~20%. These comparisons of the PDFs with noise and signal tell us that, on average, SO<sub>4</sub> is high enough in the ATom background to be unaffected by noise at any resolution. A similar analysis (not shown here) of SO<sub>2</sub> and DMS measurements also showed agreement between the 10-s interval dataset and the original dataset. Thus, the use of the 10-s data is acceptable in our study, given the significant differences in tracer statistics between model simulations and between model and observation.

We further analyze observations and simulations, similar to Figs. 2–4, but include all measurements of SO<sub>4</sub>, SO<sub>2</sub>, and DMS in Figs. S2–4, respectively. Specifically, the negative values measured by AMS, CIMS, and LIF were included. Of course, the observed median and mean values (Table S2) dropped substantially, by 17% and 13% for SO<sub>4</sub>, and by 34% and 34% for SO<sub>2</sub>. However, the model statistics (Table S2) vary relatively small, 4% and 13% for SO<sub>4</sub> and 12% and 15% for SO<sub>2</sub>.

DMS measurement is unique because it has a fraction of measured values in “-888”. An instrument typically has an operational detection range, which is defined by the lower limit of detection (LDL) and upper limit of detection (UDL). The flag for measured value less than the LDL is “-888” for TOGA and WAS data is examined in Fig. S4. The number of “-888” is not meaningless. It means that we know the value of a given measurement is below a known quantity, but we are not able to quantify that value precisely. Fig. S4 shows a similar DMS PDF analysis as Fig. 4, but instead of excluding the “-888” measurements, these are replaced with “0” as suggested by the instrument PIs. The percentage (P) of the measured “-888” is given for TOGA and WAS measurement data in the figure. These Ps for all AToms range 65% - 91%, which means majority of measured values are below LDL and the medians of both TOGA and WAS data are zero. Correspondingly, from Fig. 4 to Fig. S4, the median value of model DMS decreases from 56.6 pptv to 0.7 pptv while the mean decreases by 76%. The ratio between model

47 mean and observation mean for all AToms in Fig. S4 is 9.1, which is approximately 44% higher  
 48 than the 6.3 in Fig. 4.

49  
 50 The observed and simulated vertical profiles in each ATom are further shown in Figs. S5-8 to  
 51 reveal details of seasonal changes. For example, the SO<sub>2</sub> values measured by LIF in Fig. 7 are  
 52 lower than the average SO<sub>2</sub> values measured by CIMS, but the two SO<sub>2</sub> profiles shown in Fig. S6  
 53 in ATom-4 are in good agreement when the LIF was onboard. This means that the SO<sub>2</sub> measured  
 54 by CIMS during ATom-1 to -3 is higher than the SO<sub>2</sub> measured during ATom-4. A discussion of  
 55 some seasonal characteristics has been given in main text Sect. 3.2.

56  
 57 Overall model performance has been demonstrated in Figs 10-12. The performance of each  
 58 model on a regional and seasonal basis is further provided in Figs S9-11 to help modelers  
 59 identify strengths and weaknesses of the model's sulfur simulations. Also, the mean values  
 60 shown in the figures add information about extreme pollution. Pollution levels in the model  
 61 world and the observed world can differ substantially in certain regions of each ATom, and this  
 62 difference can be caused by the majority of models or a few individual models. Each model  
 63 performs better or worse than the others at every time and place and examples have been given  
 64 in the main text.

65  
 66 The mean values of SO<sub>4</sub>, SO<sub>2</sub>, and DMS are generally higher than the median values at most  
 67 times and locations, and the ratio of mean-to-median value in the boundary layer (BL) is even  
 68 greater than that in the free troposphere. Sometimes the ratio is very high (e.g., > 10), which  
 69 means that extreme contamination has been identified.

70  
 71 Table S1. Median and mean values (calculated when measured values are above the detection  
 72 limit) of measurements and simulations during four ATom deployments.

|                                        | ATom-1 |      | ATom-2 |      | ATom-3 |      | ATom-4 |      |
|----------------------------------------|--------|------|--------|------|--------|------|--------|------|
|                                        | median | mean | median | mean | median | mean | median | mean |
| SO <sub>4</sub> (ng sm <sup>-3</sup> ) |        |      |        |      |        |      |        |      |
| AMS                                    | 98     | 205  | 115    | 215  | 142    | 228  | 255    | 311  |
| PALMS                                  | 121    | 323  | 128    | 296  | 139    | 300  | 244    | 340  |
| CAM-<br>ATRAS                          | 131    | 468  | 92     | 207  | 74     | 330  | 208    | 298  |
| E3SMv1                                 | 427    | 576  | 215    | 286  | 246    | 405  | 268    | 433  |
| GEOS                                   | 68     | 199  | 50     | 111  | 58     | 148  | 120    | 240  |
| IMPACT                                 | 701    | 800  | 461    | 586  | 461    | 642  | 612    | 701  |
| OsloCTM3                               | 650    | 644  | 548    | 586  | 509    | 542  | –      | –    |
| SO <sub>2</sub> (pptv)                 |        |      |        |      |        |      |        |      |
| CIMS                                   | 32.4   | 60   | 27.0   | 58   | 18.2   | 31   | 13.3   | 21   |
| LIF                                    | –      | –    | –      | –    | –      | –    | 15.0   | 24   |
| CAM-<br>ATRAS                          | 10.3   | 57   | 17.7   | 53   | 14.0   | 30   | 9.4    | 21   |
| E3SMv1                                 | 5.4    | 57   | 2.7    | 30   | 6.3    | 29   | 4.9    | 20   |
| GEOS                                   | 4.1    | 89   | 6.1    | 57   | 4.0    | 57   | 7.4    | 36   |
| IMPACT                                 | 23.6   | 77   | 20.1   | 69   | 24.6   | 48   | 19.8   | 37   |

|               |     |     |     |     |     |     |    |     |
|---------------|-----|-----|-----|-----|-----|-----|----|-----|
| OsloCTM3      | 7.9 | 31  | 6.4 | 29  | –   | –   | –  | –   |
| DMS (pptv)    |     |     |     |     |     |     |    |     |
| TOGA          | –   | –   | 5   | 10  | 4   | 6   | 5  | 9   |
| WAS           | 7   | 15  | 10  | 13  | 19  | 25  | 9  | 21  |
| CAM-<br>ATRAS | 55  | 104 | 65  | 99  | 111 | 166 | 82 | 162 |
| E3SMv1        | 39  | 48  | 71  | 104 | 82  | 114 | 82 | 162 |
| GEOS          | 8   | 33  | 26  | 47  | 43  | 48  | 74 | 122 |
| IMPACT        | 8   | 33  | 50  | 51  | 12  | 44  | 26 | 47  |
| OsloCTM3      | 59  | 90  | 110 | 155 | 127 | 158 | 30 | 54  |

73  
74  
75  
76

Table S2. Similar to Table S1 but median and mean values calculated as long as the measurements are available even the values are negative.

|                                        | ATom-1 |       | ATom-2 |       | ATom-3 |       | ATom-4 |       |
|----------------------------------------|--------|-------|--------|-------|--------|-------|--------|-------|
|                                        | median | mean  | median | mean  | median | mean  | median | mean  |
| SO <sub>4</sub> (ng sm <sup>-3</sup> ) |        |       |        |       |        |       |        |       |
| AMS                                    | 88     | 190   | 94     | 183   | 120    | 201   | 193    | 257   |
| PALMS                                  | 106    | 298   | 105    | 257   | 119    | 268   | 185    | 283   |
| CAM-<br>ATRAS                          | 131    | 492   | 88     | 196   | 74     | 306   | 183    | 283   |
| E3SMv1                                 | 419    | 579   | 299    | 279   | 241    | 389   | 241    | 403   |
| GEOS                                   | 66     | 196   | 48     | 111   | 57     | 142   | 116    | 223   |
| IMPACT                                 | 691    | 558   | 452    | 366   | 458    | 485   | 530    | 464   |
| OsloCTM3                               | 650    | 610   | 543    | 557   | 506    | 524   | –      | –     |
| SO <sub>2</sub> (pptv)                 |        |       |        |       |        |       |        |       |
| CIMS                                   | 16.1   | 33    | 20.2   | 43    | 10.6   | 17    | 10.5   | 17    |
| LIF                                    |        |       |        |       |        |       | 11.7   | 19    |
| CAM-<br>ATRAS                          | 10.3   | 47    | 16.8   | 60    | 13.5   | 33    | 8.8    | 20    |
| E3SMv1                                 | 5.3    | 46    | 2.6    | 34    | 6.2    | 30    | 4.8    | 19    |
| GEOS                                   | 4.1    | 62    | 6.1    | 55    | 3.9    | 47    | 6.3    | 32    |
| IMPACT                                 | 23.8   | 70    | 20.5   | 75    | 23.3   | 48    | 16.9   | 33    |
| OsloCTM3                               | 7.6    | 26    | 6.4    | 30    | –      | –     | –      | –     |
| DMS (pptv)                             |        |       |        |       |        |       |        |       |
| TOGA                                   | –      | –     | 0.00   | 1.49  | 0.00   | 0.60  | 0.00   | 1.40  |
| WAS                                    | 0.00   | 3.57  | 0.00   | 1.63  | 0.00   | 2.91  | 0.00   | 2.67  |
| CAM-<br>ATRAS                          | 0.28   | 32.29 | 1.17   | 25.22 | 0.98   | 24.33 | 0.36   | 34.84 |
| E3SMv1                                 | 0.02   | 12.12 | 0.14   | 15.68 | 0.47   | 17.67 | 0.20   | 28.71 |
| GEOS                                   | 0.02   | 7.32  | 0.11   | 11.60 | 0.07   | 5.74  | 0.03   | 7.53  |
| IMPACT                                 | 0.26   | 8.18  | 1.95   | 14.05 | 1.83   | 10.11 | 0.76   | 12.00 |
| OsloCTM3                               | 0.52   | 22.58 | 2.39   | 62.71 | 2.03   | 29.47 | –      | –     |

77

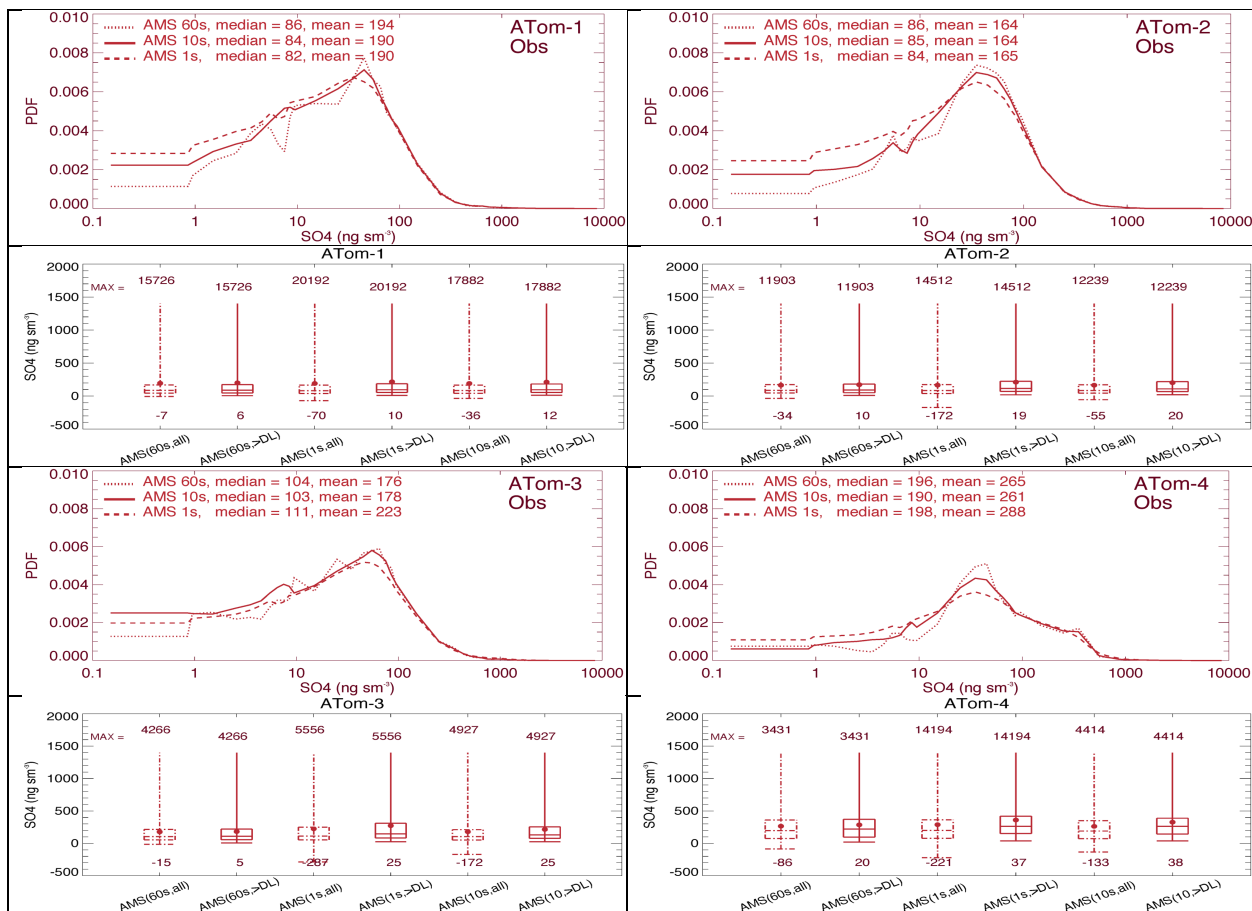

Figure S1. SO<sub>4</sub> PDF distributions reported in three-time frequencies (1-s, 10-s, and 60-s) for four ATom deployments. Statistical values shown in dashed box-and-whisker include all reported data, while in the solid box-and-whisker include data above detection limit (DL). Statistics give the range of data from the minimum to the maximum values, the three levels of 25<sup>th</sup>, 50<sup>th</sup> (aka median value), and 75<sup>th</sup> percentiles in the box, and the mean values (filled circles).

78  
79  
80  
81  
82  
83  
84  
85  
86

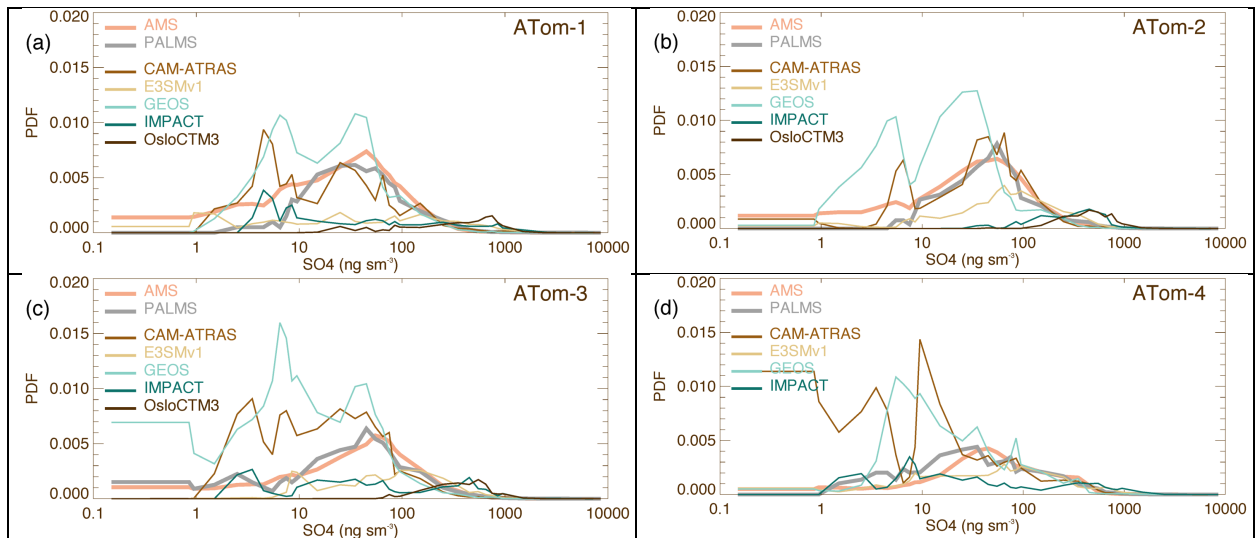

Figure S2. Similar to Fig. 2 but the median/mean values are calculated as long as the measurements are available even the values are negative.

87  
88  
89

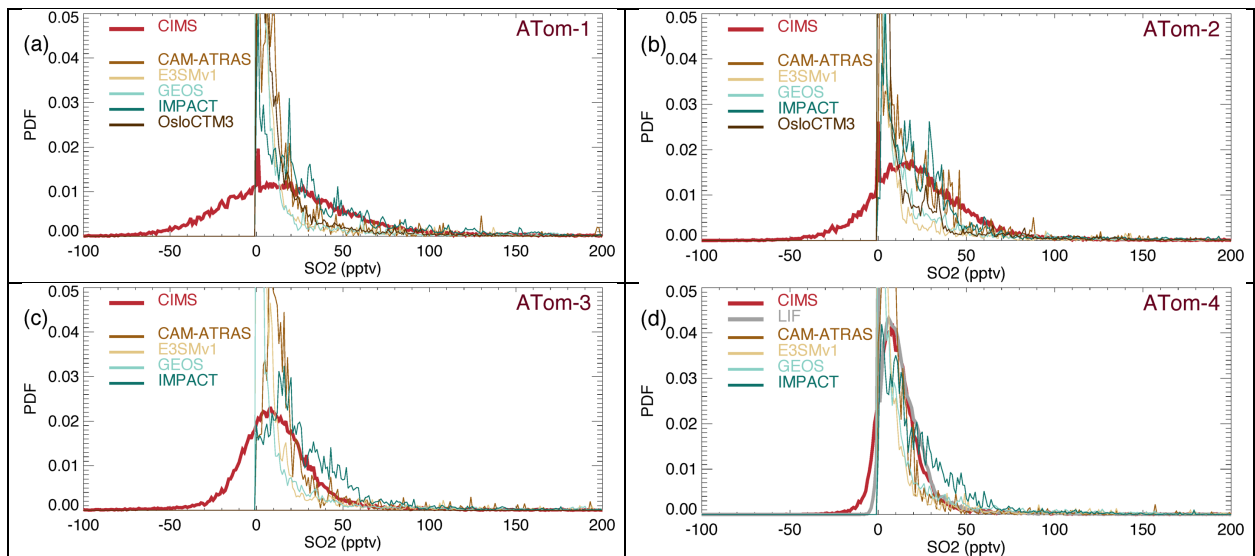

Figure S3. Similar to Fig. 3, but the median/mean values are calculated as long as the measurements are available even the values are negative.

90  
91  
92

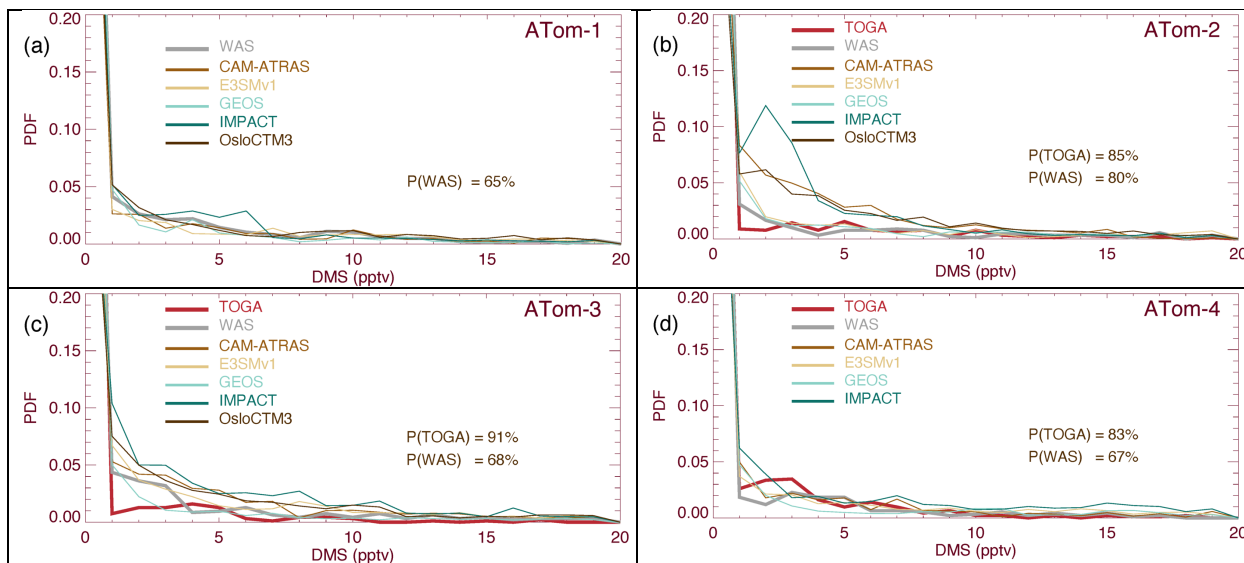

Figure S4. Similar to Fig. 4, but instead of excluding the “-888” measurements, these are replaced with 0 as suggested by the instrument PIs. The percentage (P) of the measured “-888” is given for TOGA and WAS measurement data. Model median/mean values are calculated when measurements including these “-888” are available.

93

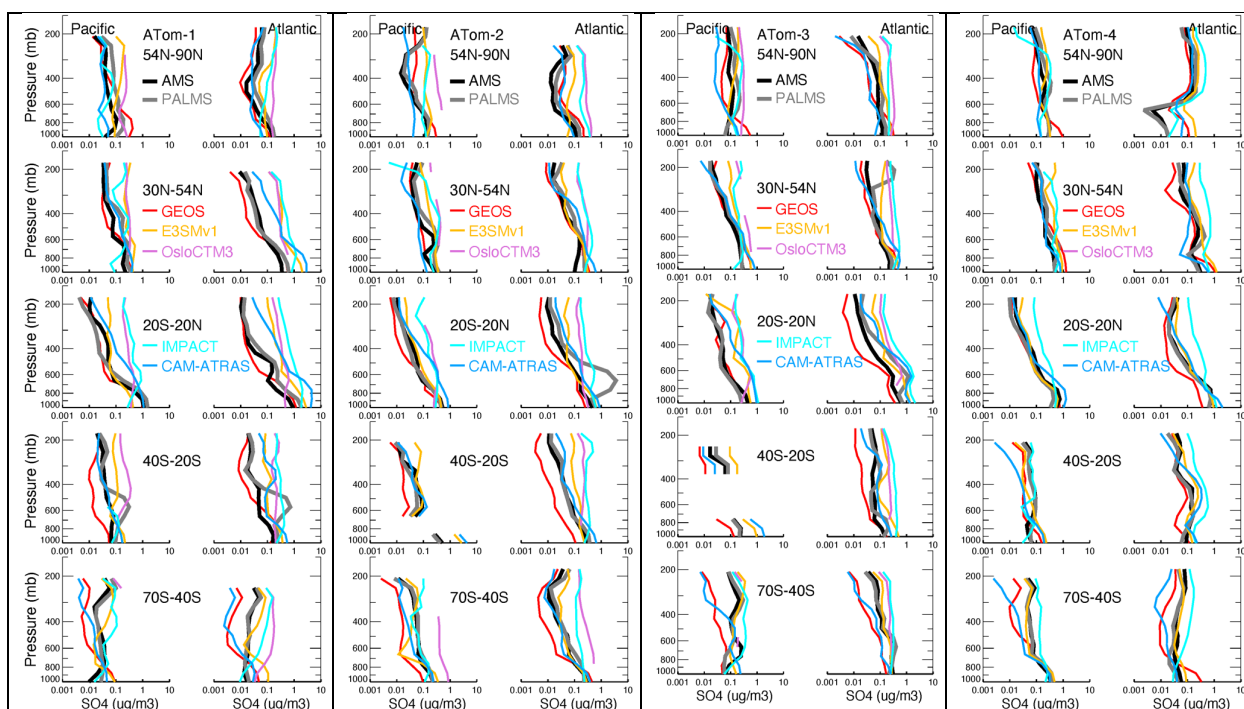

Figure S5. Observed and modeled vertical profiles of  $\text{SO}_4$  in 1-km vertical bins for four ATom deployments shown from left to right. ATom measurements are shown in black and grey lines while model results are shown in color lines. Comparisons are conducted only when both observational measurements above detect limitation are available. Comparisons are separated into five latitude bands from the Northern to the Southern Hemisphere, and into Pacific and Atlantic Basins.

94

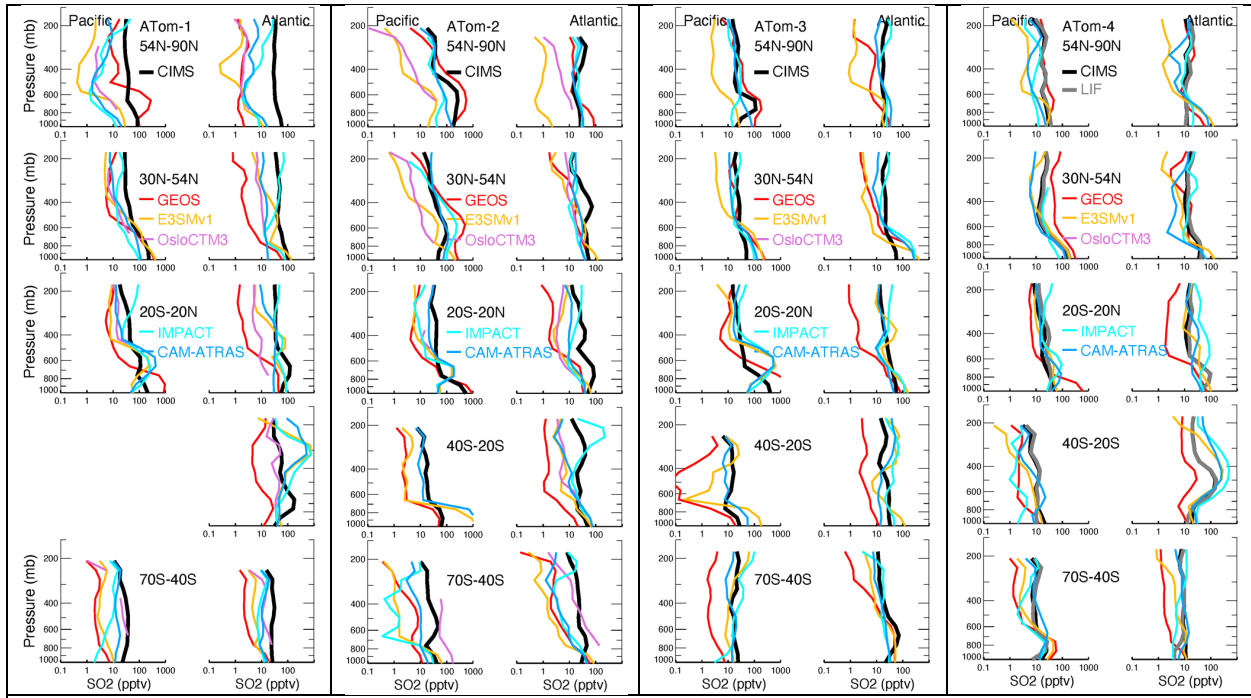

Figure S6. Similar to Fig. S5 but for SO<sub>2</sub>.

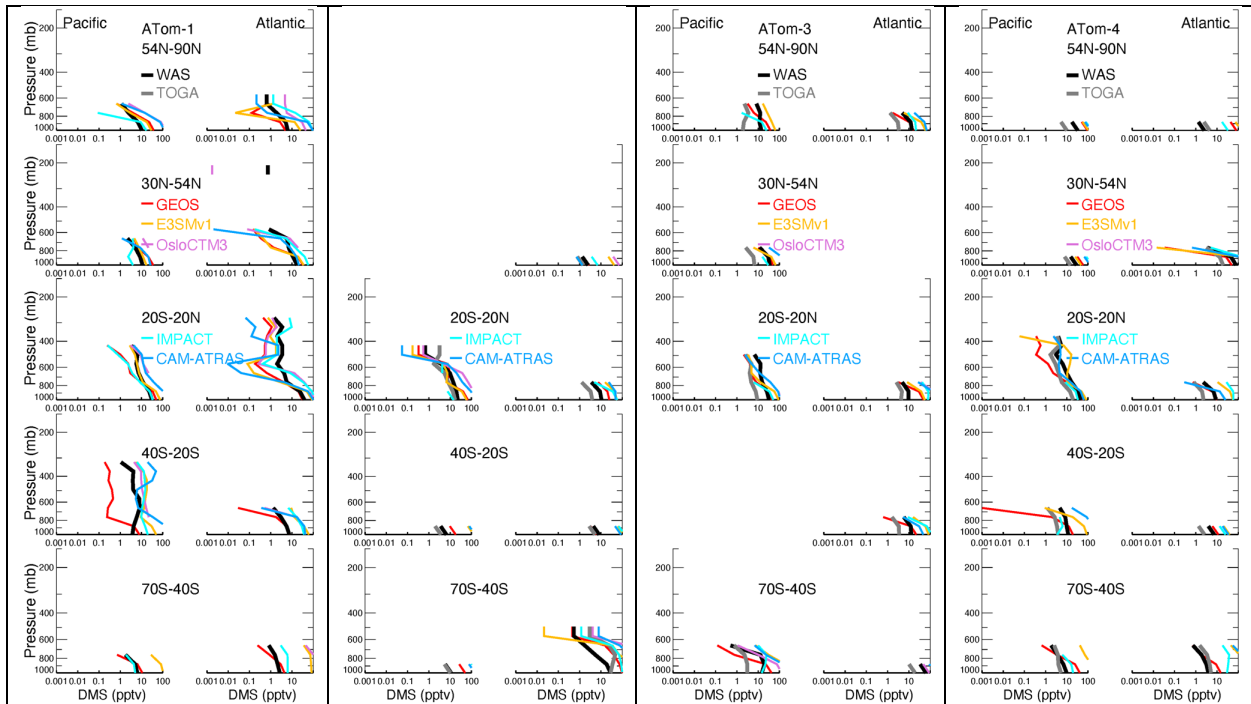

Figure S7. Similar to Fig. S5 but for DMS.



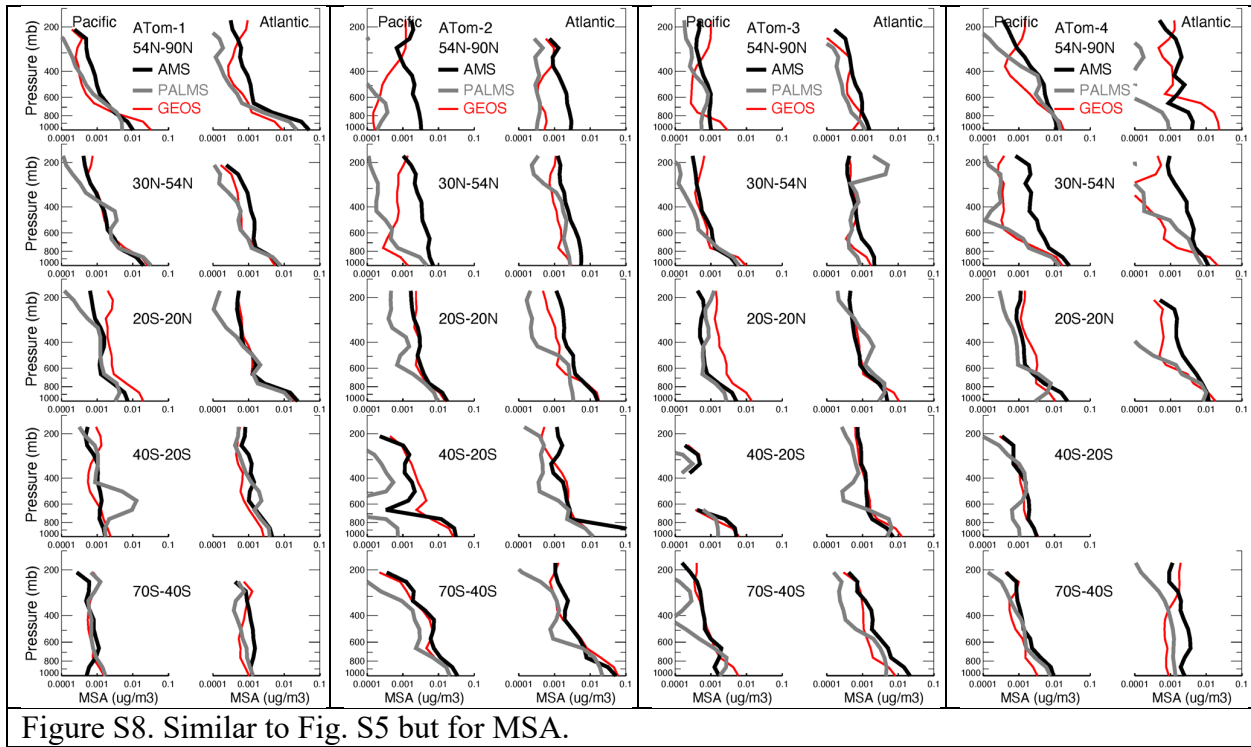

99  
 100  
 101  
 102  
 103  
 104  
 105  
 106  
 107  
 108  
 109  
 110  
 111  
 112  
 113  
 114  
 115  
 116  
 117  
 118  
 119  
 120  
 121  
 122  
 123

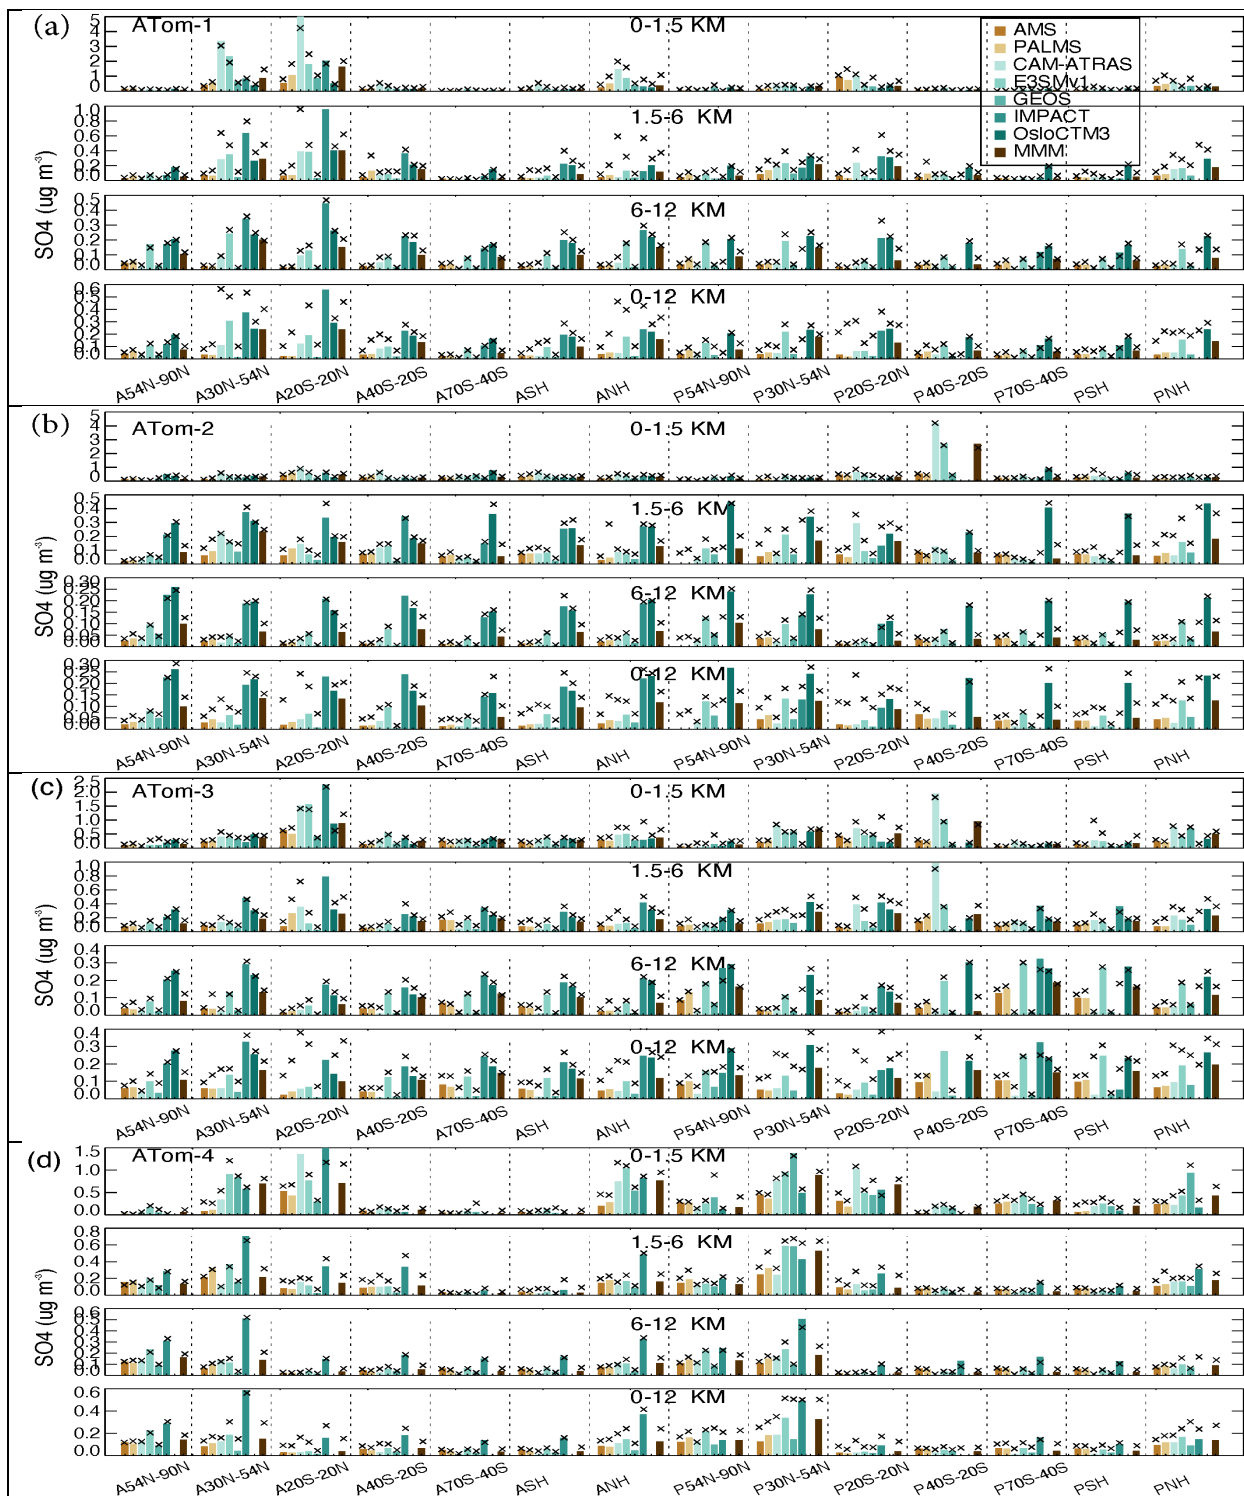

Figure S9. Median (histogram) and mean (symbol x) values of SO<sub>4</sub> from two measurements (orange and yellow), five model simulations (other bluish colors), and multi-model simulation (black) analyzed over five latitudinal bands and SH and NH over Atlantic and Pacific oceans in four vertical layers (i.e., 0-1.5 km, 1.5-6 km, 6-12km, and 0-12 km) for four ATom deployments (a-d).

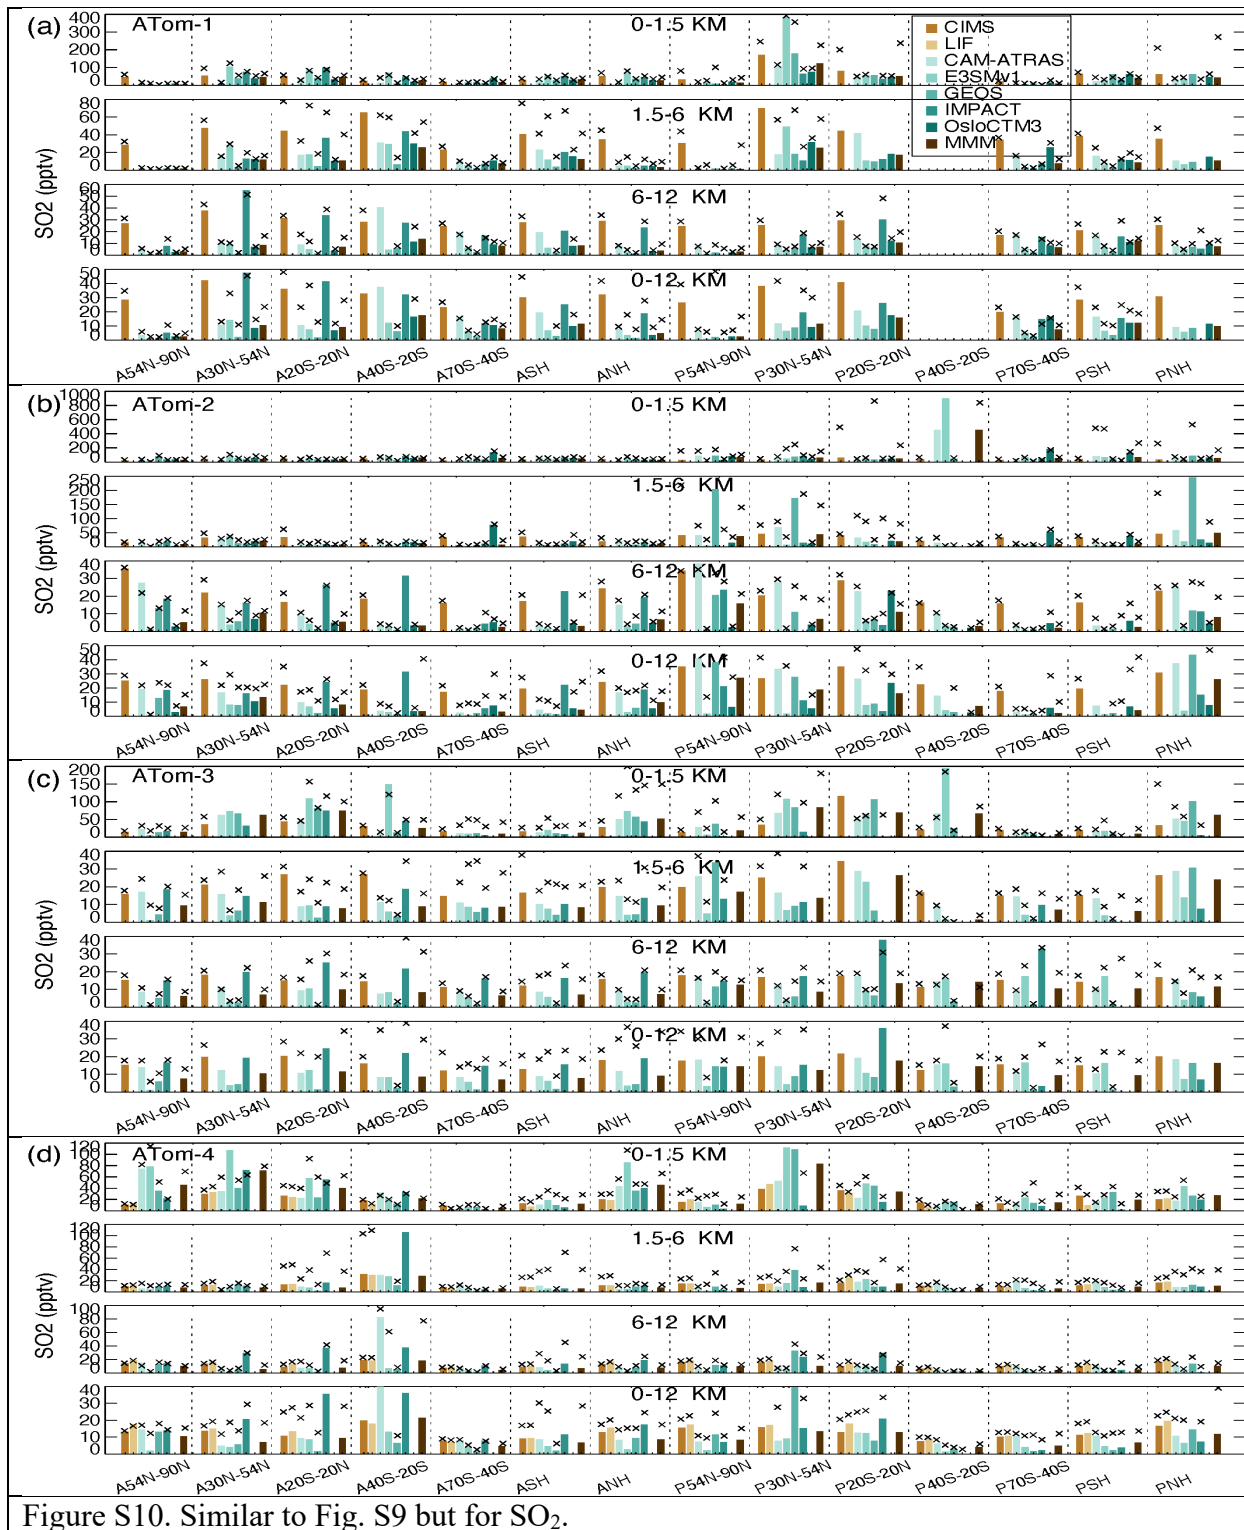

Figure S10. Similar to Fig. S9 but for SO<sub>2</sub>.

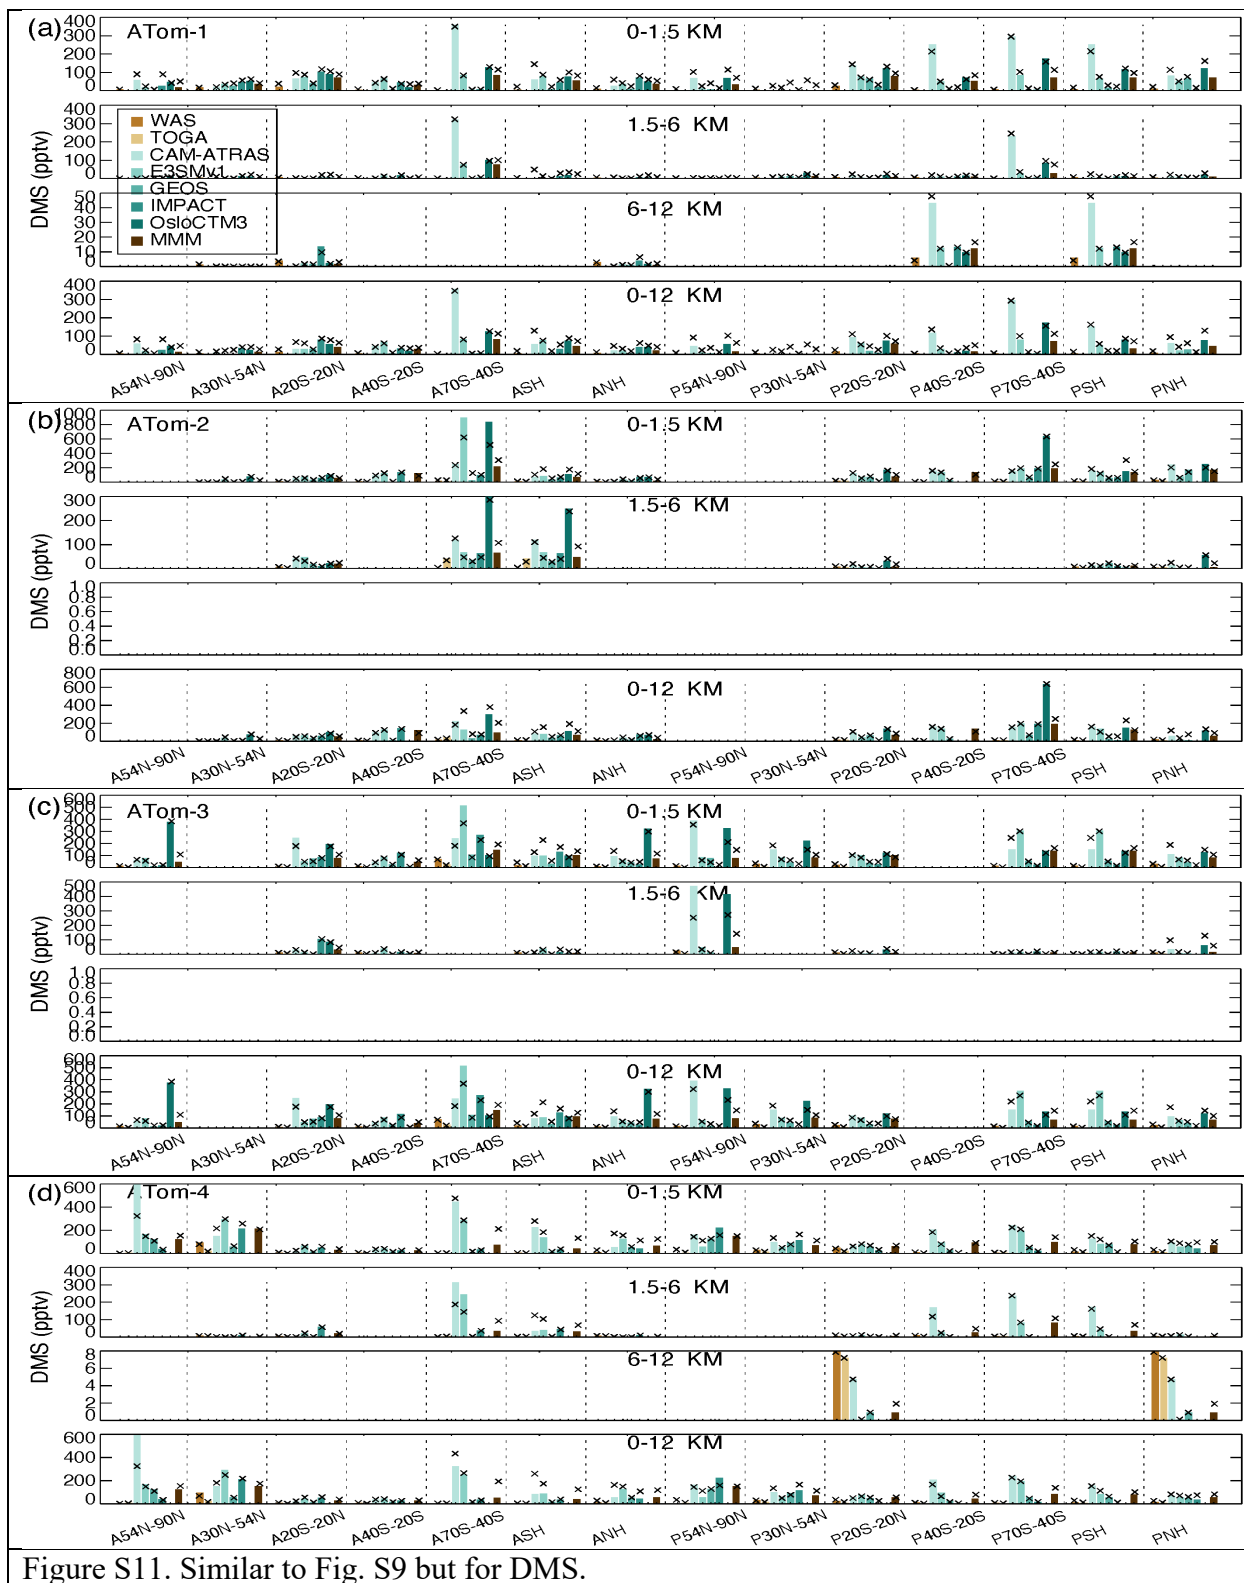

Figure S11. Similar to Fig. S9 but for DMS.

126  
127  
128
